# Supplementary material for: Pre-obese children’s dysbiotic gut microbiome and unhealthy diets may predict the development of obesity
Source: PubMed Central journal article supplement (PMC6286349; doi:10.1038/s42003-018-0221-5), 2018-12-07
Supplement: 42003_2018_221_MOESM1_ESM.pdf [file 42003_2018_221_MOESM1_ESM.pdf]

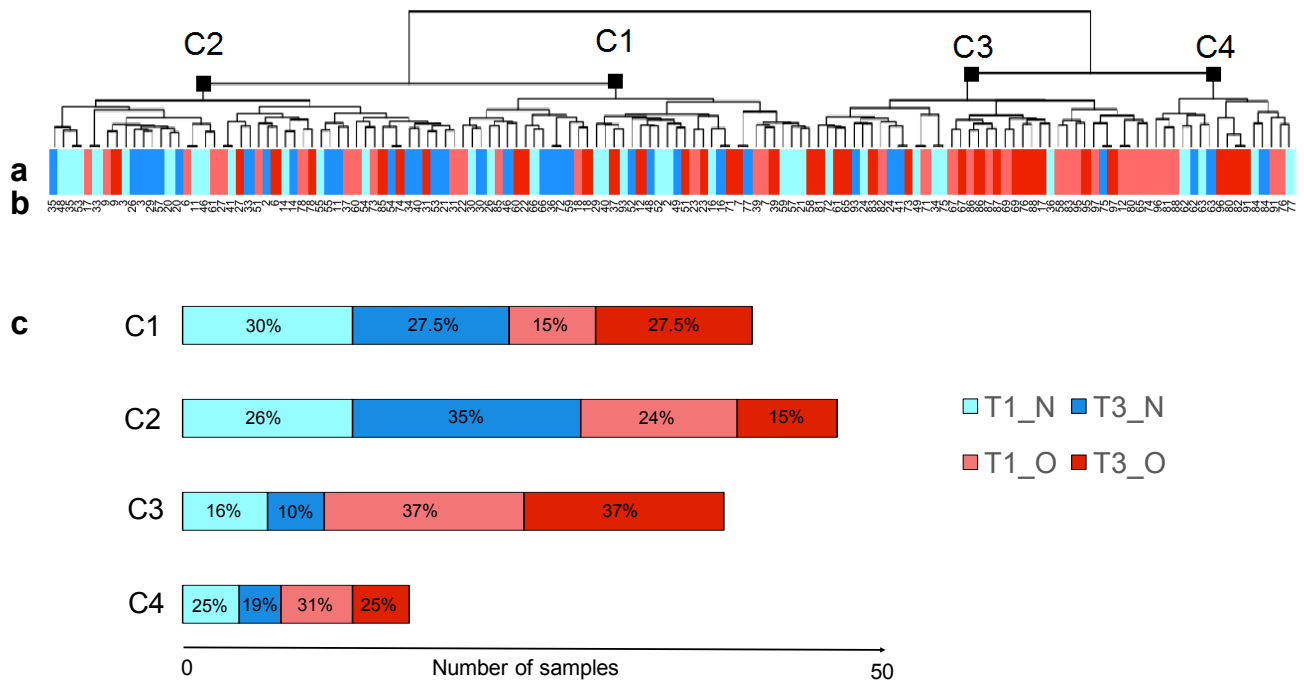

**Supplementary Figure 1.** Hierarchical Ward linkage clustering based on the Spearman correlation coefficients of the proportion of OTUs, filtered for OTU subject prevalence of at least 20%. Subject colour coding in **a**: pink, T1 normal weight children that will develop obesity (T1\_O); red, T3 obese children (T3\_O); cyan, T1 normal weight children (T1\_N); light blue, T3 normal weight children (T3\_N). Subject IDs are reported in **b**. The correspondence between subject IDs and sample IDs is shown in Supplementary Data 1. Labelled clusters in the top of the panel (representing the basis for the four groups in Fig. 1) are highlighted by black squares. The number and percentage of samples from T1\_N, T3\_N, T1\_O and T3\_O groups for each cluster are shown in **c** by bar plots.

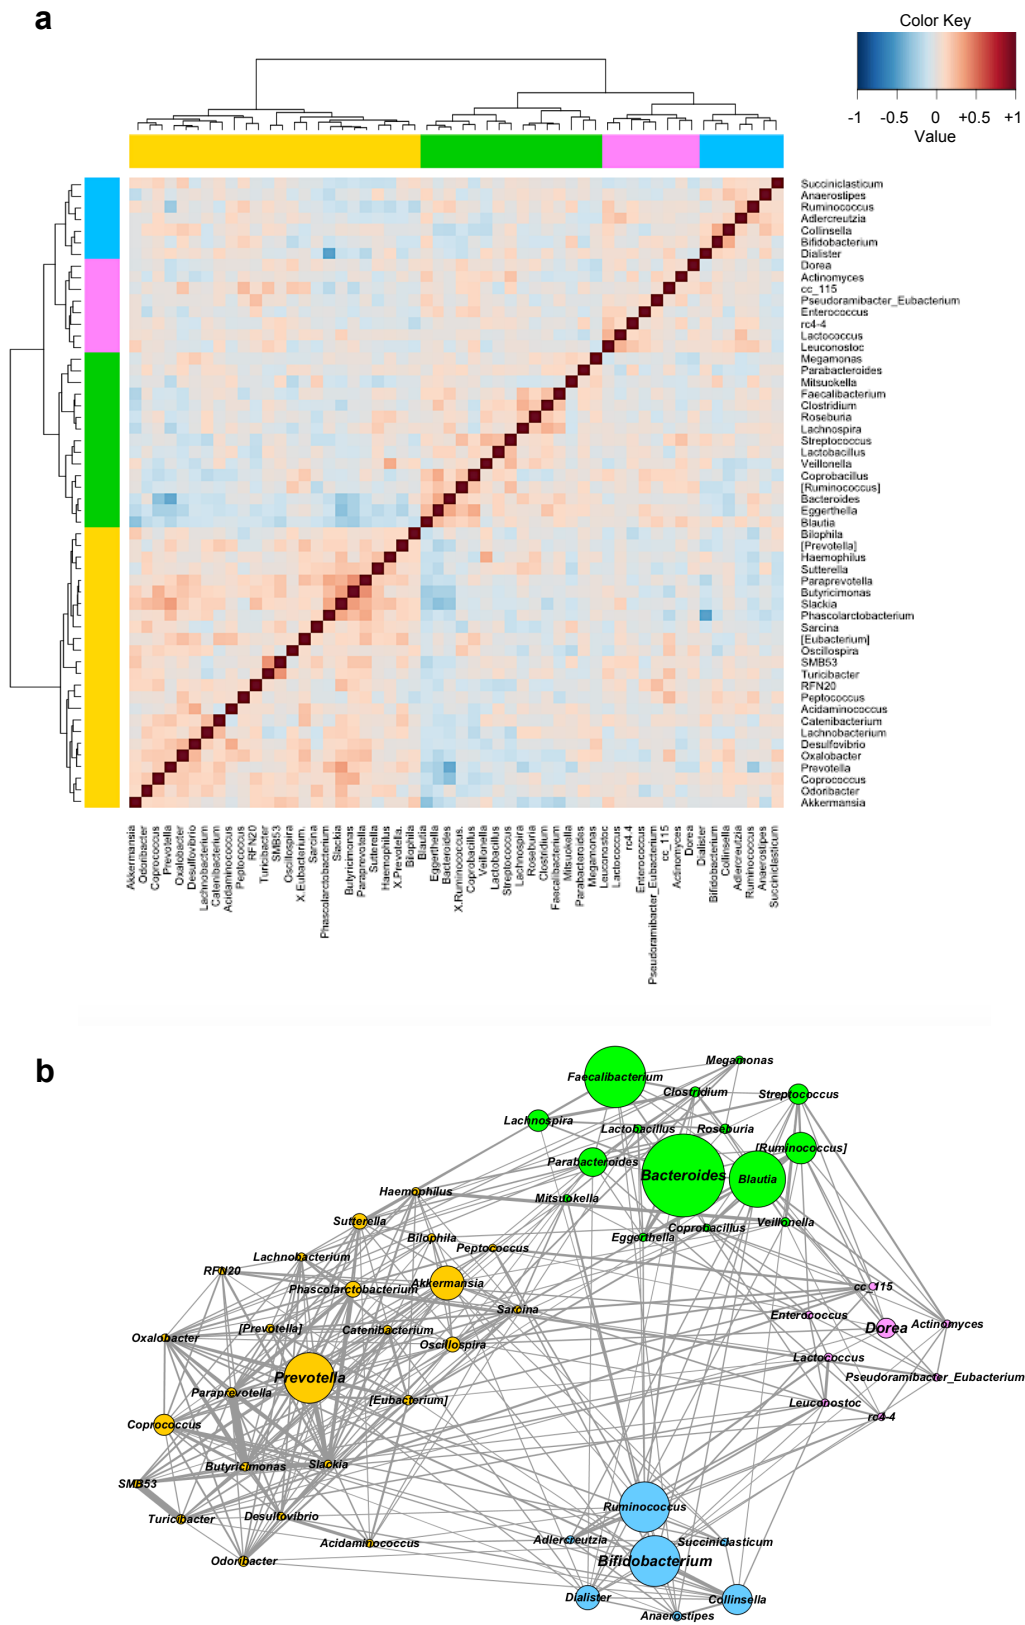

Spearman correlation coefficient and Ward linkage hierarchical clustering. Colours are indicative of the four identified CAGs. **b**, Wiggum plot correlations between the four CAGs identified. Circle size is proportional to the genus abundance and the connections between nodes represent positive and significant Kendall correlations between genera (FDR<0.05).

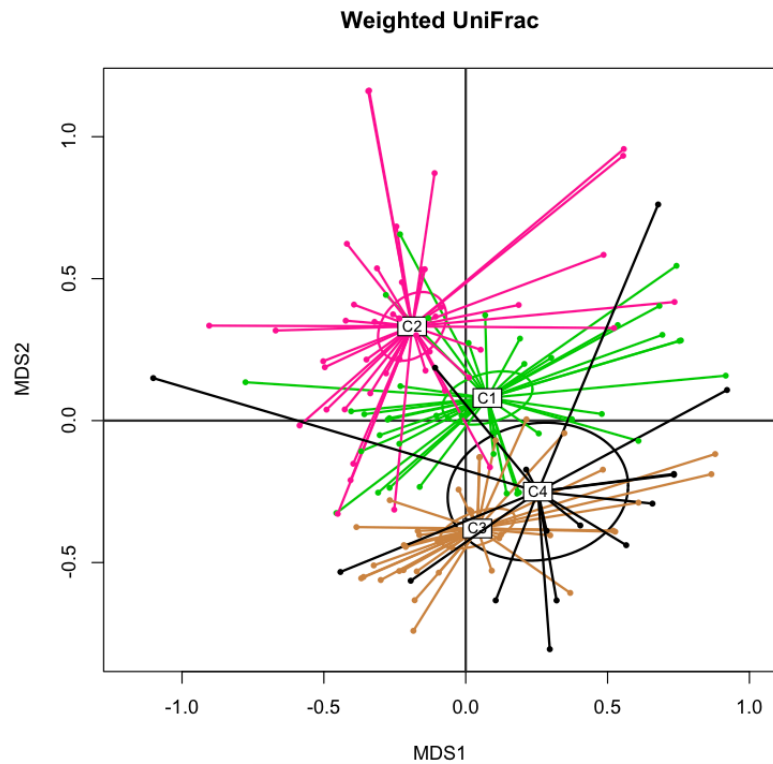

**Supplementary Figure 3.** Weighted UniFrac PCoA showing the four significantly different groups of subjects (C1 to C4,  $p < 0.001$ , permutation test with pseudo-F ratios), as defined by OTU clustering (see Supplementary Figure 1).

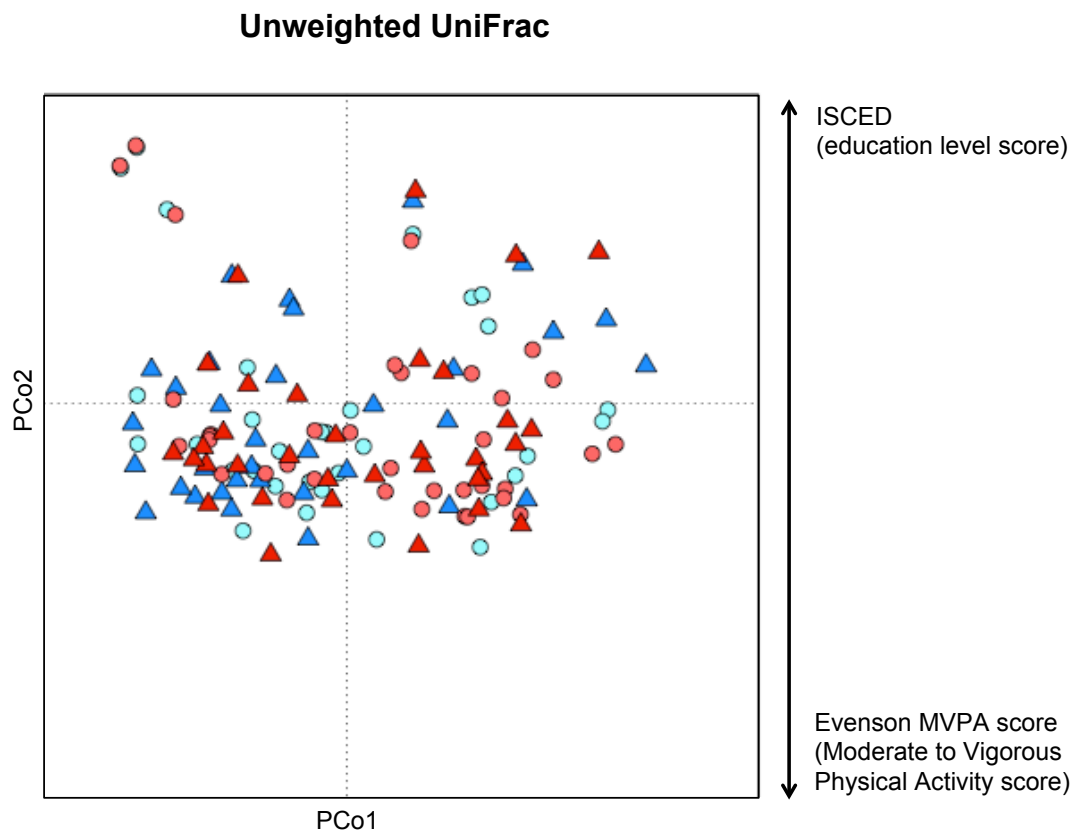

**Supplementary Figure 4.** Unweighted UniFrac PCoA of the faecal microbiota from 70 children at two different time points. Pink circles, T1 normal weight children that will develop obesity (T1\_O); red triangles, T3 obese children (T3\_O); cyan circles, T1 normal weight children (T1\_N); light blue triangles, T3 normal weight children (T3\_N). The variables significantly associated with the second axis are highlighted. See also Table 1.

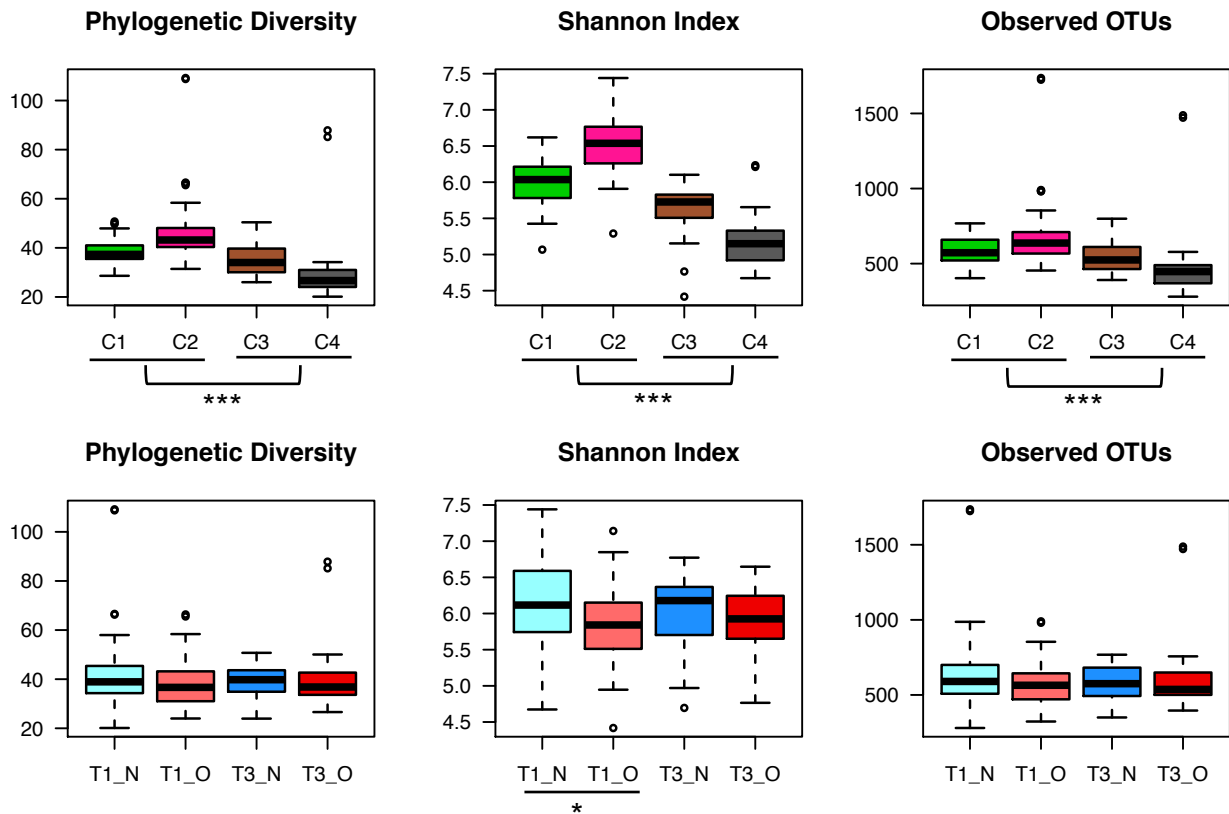

**Supplementary Figure 5.** Evaluation of  $\alpha$ -diversity among sample groups. The OTU table at 0.03 similarity threshold was rarefied up to 12,000 reads per sample and analysed using various diversity metrics (Faith's Phylogenetic Diversity (PD whole tree), observed OTUs, and the Shannon index of biodiversity). According to all metrics, greater diversity (\*\*\*,  $p < 0.000001$ , Kruskal-Wallis test) was observed in C1/C2 compared to C3/C4 microbiota configuration (top). When clustered by T1\_N, T1\_O, T3\_N and T3\_O groups, we found a significant difference between T1\_N and T1\_O samples (\*,  $p < 0.01$ , Wilcoxon test) only when we used the Shannon index (bottom).

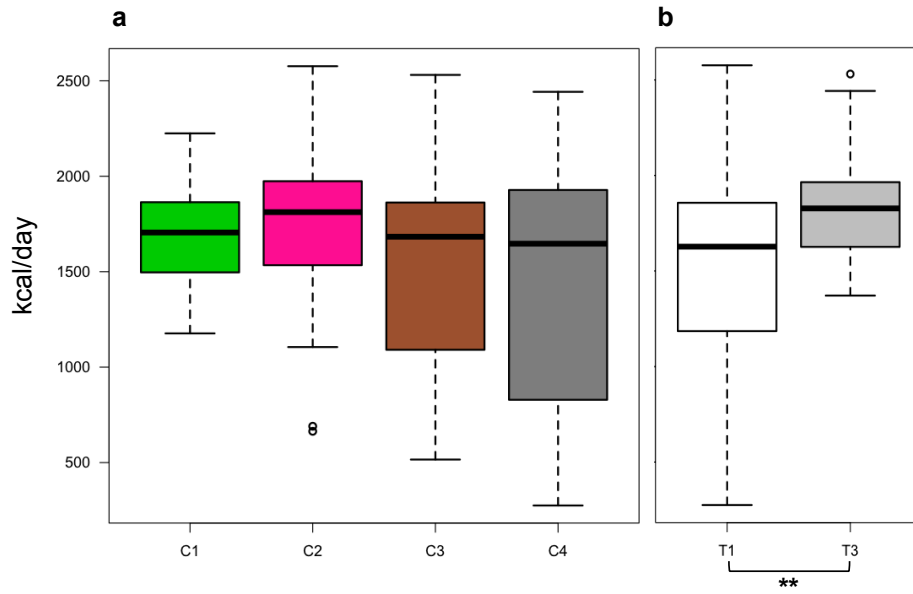

**Supplementary Figure 6.** Gut microbiota configurations and total daily caloric intake. **a**, Microbiota configurations (C1 to C4) are independent of the total daily kilocalorie intake. **b**, A significant increase in kilocalorie intake was observed at T3 compared to T1 (\*\*,  $p < 0.001$ , Wilcoxon test), in accordance with the growth of children.

**Supplementary Table 1. Food description and average consumption values (grams per day) for each of the four microbiota groups**

| Food                                 | Description                                                                       | Food Category                            | Microbiota group |       |       |       |
|--------------------------------------|-----------------------------------------------------------------------------------|------------------------------------------|------------------|-------|-------|-------|
|                                      |                                                                                   |                                          | C1               | C2    | C3    | C4    |
| porridge and muesli                  | Porridge, oat meal, gruel, unsweetened cereals, plain muesli                      | Breakfast Cereals                        | 0.298            | 0.365 | 0.202 | 0.200 |
| sweetened cereals                    | sweetened or sugar added breakfast cereals and sweetened crisp muesli             | Breakfast Cereals                        | 0.464            | 0.462 | 0.366 | 0.325 |
| not homemade sandwiches              | Hamburger, hotdog, kebab, wrap, falafel                                           | Cereal                                   | 0.260            | 0.308 | 0.240 | 0.181 |
| pasta, noodles, rice                 | Pasta, noodles, rice                                                              | Cereal                                   | 0.368            | 0.410 | 0.400 | 0.544 |
| Pizza                                | Pizza                                                                             | Cereal                                   | 0.023            | 0.045 | 0.058 | 0.205 |
| polenta, couscous and cereal pudding | Dish of milled cereals (rice or semolina pudding, polenta, couscous)              | Cereal                                   | 0.061            | 0.051 | 0.051 | 0.078 |
| white bread                          | White bread                                                                       | Cereal                                   | 0.793            | 0.958 | 0.889 | 1.075 |
| whole meal bread                     | Whole meal bread                                                                  | Cereal                                   | 0.760            | 0.839 | 0.454 | 0.384 |
| grated cheese                        | Grated cheese (parmesan, pecorino..)                                              | Cheese                                   | 0.150            | 0.182 | 0.238 | 0.326 |
| sliced cheese                        | Sliced cheese (Hard cheese like Chester, Emmental, Alpine cheese..)               | Cheese                                   | 0.573            | 0.637 | 0.550 | 0.731 |
| spreadable cheese                    | Spreadable cheese (brie, camembert and ricotta in addition to the cream cheese..) | Cheese                                   | 0.177            | 0.215 | 0.261 | 0.237 |
| diet drinks                          | Diet and soft drinks                                                              | Drinks                                   | 0.015            | 0.028 | 0.173 | 0.000 |
| fruit juices                         | Fruit Juices                                                                      | Drinks                                   | 1.045            | 0.678 | 0.776 | 0.594 |
| sweetened drinks                     | Sweetened drinks                                                                  | Drinks                                   | 0.295            | 0.311 | 0.685 | 0.350 |
| Water                                | Water                                                                             | Drinks                                   | 2.010            | 2.350 | 3.089 | 3.456 |
| boiled eggs                          | boiled or poached eggs                                                            | Eggs                                     | 0.168            | 0.153 | 0.101 | 0.156 |
| fried eggs                           | fried or scrambled eggs                                                           | Eggs                                     | 0.198            | 0.150 | 0.105 | 0.158 |
| Mayonnaise                           | Mayonnaise and mayonnaise based products                                          | Eggs                                     | 0.078            | 0.089 | 0.084 | 0.144 |
| Fish                                 | Fresh or frozen or canned fish not fried                                          | Fish                                     | 0.182            | 0.185 | 0.106 | 0.065 |
| fried fish                           | Fried Fish                                                                        | Fish                                     | 0.108            | 0.150 | 0.140 | 0.113 |
| fresh fruit                          | Fresh fruit without added sugar                                                   | Fruit                                    | 0.725            | 0.933 | 1.179 | 1.338 |
| fresh fruit with sugar               | Fresh fruit with added sugar                                                      | Fruit                                    | 0.315            | 0.342 | 0.176 | 0.329 |
| fried meat                           | fried meat                                                                        | Meat                                     | 0.230            | 0.378 | 0.468 | 0.506 |
| Meat                                 | Fresh meat not fried                                                              | Meat                                     | 0.418            | 0.524 | 0.555 | 0.475 |
| slide ham and sausages               | Cold cuts and preserved, ready to cook meat product                               | Meat                                     | 0.470            | 0.474 | 0.750 | 0.869 |
| tofu and soy products                | Tofu, tempè, quorn, soy milk                                                      | Meat replacement product and soy product | 0.008            | 0.000 | 0.000 | 0.019 |
| flavoured milk                       | Sweetened or flavoured milk                                                       | Milk                                     | 0.065            | 0.081 | 0.064 | 0.063 |
| Milk                                 | Plain unsweetened milk                                                            | Milk                                     | 0.316            | 0.511 | 0.255 | 0.214 |
| low fat milk                         | Sweetened or flavoured skimmed or low fat milk                                    | Milk                                     | 0.707            | 0.541 | 0.718 | 0.909 |
| low fat flavoured milk               | Plain unsweetened skimmed or low fat milk                                         | Milk                                     | 0.116            | 0.073 | 0.280 | 0.231 |
| biscuits and sweet snacks            | biscuits, packaged cakes or pastries                                              | Snacks                                   | 0.240            | 0.324 | 0.341 | 0.131 |
| candies and gums                     | Candies, loose candies and marshmallow                                            | Snacks                                   | 0.290            | 0.312 | 0.307 | 0.144 |
| chocolate bars                       | chocolate candy and bars                                                          | Snacks                                   | 0.271            | 0.279 | 0.267 | 0.256 |
| Crisps                               | Crisps, corn crisps, popcorn                                                      | Snacks                                   | 0.105            | 0.165 | 0.191 | 0.181 |
| ice cream                            | Ice cream, milk and fruit based bars                                              | Snacks                                   | 0.215            | 0.244 | 0.277 | 0.110 |
| nuts, seeds, dried fruit             | Nuts, seeds and dried fruits                                                      | Snacks                                   | 0.172            | 0.295 | 0.144 | 0.138 |
| salty snacks                         | Savoury pastries and fritters                                                     | Snacks                                   | 0.145            | 0.176 | 0.260 | 0.181 |
| butter, margarine                    | Butter, margarine on bread                                                        | Spreadable products                      | 0.815            | 0.765 | 0.932 | 0.688 |
| chocolate spread                     | Chocolate or nut-based spread                                                     | Spreadable products                      | 0.160            | 0.212 | 0.186 | 0.174 |
| jam and honey                        | Jam, honey                                                                        | Spreadable products                      | 0.315            | 0.404 | 0.251 | 0.213 |
| Ketchup                              | Ketchup                                                                           | Spreadable products                      | 0.250            | 0.313 | 0.297 | 0.337 |
| reduced-fat butter, margarine        | Reduced-fat butter or margarine                                                   | Spreadable products                      | 0.111            | 0.169 | 0.236 | 0.426 |
| cooked vegetables                    | Cooked Vegetable, potatoes and beans                                              | Vegetable                                | 0.741            | 0.607 | 0.592 | 0.663 |
| fried potatoes                       | Fried potatoes                                                                    | Vegetable                                | 0.216            | 0.180 | 0.279 | 0.094 |



| Food                            | Description                                                             | Food Category | Microbiota group |       |       |       |
|---------------------------------|-------------------------------------------------------------------------|---------------|------------------|-------|-------|-------|
|                                 |                                                                         |               | C1               | C2    | C3    | C4    |
| Legumes                         | Legumes                                                                 | Vegetable     | 0.175            | 0.153 | 0.233 | 0.136 |
| raw vegetables                  | raw vegetables (mixed salad, carrot, fennel, cucumber, lettuce, tomato) | Vegetable     | 0.720            | 0.752 | 0.576 | 0.900 |
| plain yoghurt or kefir          | Plain unsweetened yoghurt or kefir                                      | Yoghurt       | 0.062            | 0.166 | 0.058 | 0.162 |
| sweet yoghurt or fermented milk | Sweetened yoghurt or fermented milk                                     | Yoghurt       | 0.221            | 0.300 | 0.113 | 0.131 |
| low fat yoghurt                 | Plain unsweetened low fat yoghurt                                       | Yoghurt       | 0.049            | 0.076 | 0.211 | 0.115 |
| low fat sweet yoghurt           | Sweetened low fat yoghurt                                               | Yoghurt       | 0.126            | 0.124 | 0.242 | 0.113 |

**Supplementary Table 2. Methods applied for anthropometric measurements and laboratory analyses**

| Measurement/ analysis                                        | Device / Analysis method                                                                                                                                                                                                               | Description                                                                                                                                                                                                                                                               | Reference |
|--------------------------------------------------------------|----------------------------------------------------------------------------------------------------------------------------------------------------------------------------------------------------------------------------------------|---------------------------------------------------------------------------------------------------------------------------------------------------------------------------------------------------------------------------------------------------------------------------|-----------|
| <b>Anthropometrics, blood pressure and physical activity</b> |                                                                                                                                                                                                                                        |                                                                                                                                                                                                                                                                           |           |
| Height                                                       | Telescopic height measuring instrument (Seca 225 or 213 stadiometer, Birmingham, UK)                                                                                                                                                   | Measured barefoot to the nearest 0.1 cm.                                                                                                                                                                                                                                  | S1        |
| Weight                                                       | Electronic scale: Tanita BC 420 MA at T0/T1, for children ≤6 years adapted; BC 418 MA for children >6 years at T3 (Tanita Europe GmbH, Sindelfingen, Germany)                                                                          | Children wore only underwear and a t-shirt, measured to the nearest 0.1 kg                                                                                                                                                                                                | S1        |
| BMI z-score                                                  | Weight [kg] divided by height [m] squared                                                                                                                                                                                              | z-scores based on age- and sex-specific reference percentiles                                                                                                                                                                                                             | S2        |
| Blood pressure                                               | Automated oscillometric device (Welch Allyn, Inc., 4200B-E2, Skaneateles Falls, NY, USA)                                                                                                                                               | At the right arm after at least 5 minutes of rest in seated position. Two recordings with a 2-min interval, plus a third measurement in case of a >5% difference between the first two readings. Outcome: Mean value of the two measurements with the smallest difference | S3        |
| Physical activity score (MVPA)                               | Uniaxial Actigraph accelerometer (Actigraph MTI, model GT1M, Manufacturing Technology Inc., Fort Walton Beach, FL, USA); ActiTrainer with the same technology as the Actigraph                                                         | Time spent in moderate-to-vigorous physical activity (MVPA) according to the cutpoints of Evenson et al. (2008)                                                                                                                                                           | S4, S5    |
| <b>Biomarkers</b>                                            |                                                                                                                                                                                                                                        |                                                                                                                                                                                                                                                                           |           |
| Fasting glucose and triglycerides (TG)                       | Point-of-care analysis in one drop of native capillary or venous blood on the spot the Cholestech LDX analyzer (Cholestech, Hayward, CA) in T0/T1; Enzymatic colorimetric test (Cobas c701, Roche Diagnostics GmbH, Mannheim) in T3    | The detection limit for TG was 0.509 mmol/l.                                                                                                                                                                                                                              | S6        |
| C-reactive protein (CRP)                                     | Serum high-sensitivity CRP concentrations measured with latex-enhanced nephelometry (BN2-Nephelometer, Siemens, Eschborn, Germany)                                                                                                     | The serum CRP values were measured with a precision of 0.1 mg/l and a lower detection limit of 0.2 mg/l.                                                                                                                                                                  | S7        |
| TNF- $\alpha$ , IL-6, IL-8, IL-15, IP-10                     | Protein Multiplex analyzes with electrochemiluminescence technology from Meso Scale discovery (MSD); MULTI-SPOT $\text{\textcircled{R}}$ Assay System; Cytokine Plate Human SP 6Plex: IL-6, IL-8, IL-15, IP-10, TNF- $\alpha$ , IL-1Ra | The detection limits observed with MSD MULTI-ARRAY and MULTISPOT Human Serum and Plasma Cytokine Assays are in the range of 0.5-10 pg/mL                                                                                                                                  |           |

## Supplementary References

- S1. Stomfai, S. et al. Intra- and inter-observer reliability in anthropometric measurements in children. *Int. J. Obes. (Lond.)* **35**, S45-S51 (2011).
- S2. Cole, T. J. & Lobstein, T. Extended international (IOTF) body mass index cut-offs for thinness, overweight and obesity. *Pediatr. Obes.* **7**, 284-294 (2012).
- S3. Wolters, M. et al. Associations of whole blood n-3 and n-6 polyunsaturated fatty acids with blood pressure in children and adolescents - results from the IDEFICS/I.Family cohort. *PLoS One* **11**, e0165981 (2016).
- S4. Evenson, K. R. et al. Calibration of two objective measures of physical activity for children. *J. Sports Sci.* **26**, 1557-1565 (2008).
- S5. Konstabel, K. et al. Objectively measured physical activity in European children: the IDEFICS study. *Int. J. Obes. (Lond.)* **38**, S135-S143 (2014).
- S6. Peplies, J. et al. Percentiles of fasting serum insulin, glucose, HbA1c and HOMA-IR in pre-pubertal normal weight European children from the IDEFICS cohort. *Int. J. Obes. (Lond.)* **38**, S39-S47 (2014).
- S7. Schlenz, H. et al. C-reactive protein reference percentiles among pre-adolescent children in Europe based on the IDEFICS study population. *Int. J. Obes. (Lond.)* **38**, S26-S31 (2014).
