# Supplementary material for: Pre-obese children’s dysbiotic gut microbiome and unhealthy diets may predict the development of obesity
Source: Commun Biol. 2018 Dec 7;1:222. doi: 10.1038/s42003-018-0221-5 (PMC6286349; doi:10.1038/s42003-018-0221-5)
Supplement: Supplementary file 2 — Supplementary Data 1 [file 42003_2018_221_MOESM2_ESM.xlsx]

## Sheet: Foglio1
Supplementary Data 1. Summary of dietary group, microbiota group and physical activity score for each of the 70 subjects at two sampling time points
ID	Group	Obs	Dietary group	Microbiota group	Physical Activity (MVPA score)	MVPA/mean(MVPA)	Gender
Ide13	T1_N	2	D1	C1	9	0.380665	Male
Ifa54	T3_N	2	D2	C2	NA	NA
Ide18	T1_N	3	D1	C2	21	0.888218	Female
Ifa62	T3_N	3	D2	C2	NA	NA
Ide10	T1_O	6	D1	C2	44	1.86103	Female
Ifa45	T3_O	6	D3	C2	NA	NA
Ide17	T1_O	7	D3	C1	12	0.507553	Male
Ifa50	T3_O	7	D4	C1	NA	NA
Ide19	T1_O	9	D1	C2	17	0.719033	Female
Ifa46	T3_O	9	D3	C2	NA	NA
Ide1	T1_N	11	D2	C2	30	1.26888	Male
Ifa59	T3_N	11	D2	C2	NA	NA
Ide3	T1_O	12	D5	C3	24	1.01511	Female
Ifa47	T3_O	12	D4	C1	NA	NA
Ide16	T1_N	14	D4	C2	8	0.338369	Female
Ifa63	T3_N	14	D2	C2	NA	NA
Ide15	T1_N	16	D4	C1	15	0.634441	Female
Ifa60	T3_N	16	D2	C1	NA	NA
Ide7	T1_O	17	D5	C2	7	0.296073	Female
Ifa65	T3_O	17	D5	C3	NA	NA
Ide14	T1_O	18	D4	C1	22	0.930514	Female
Ifa44	T3_O	18	D5	C1	NA	NA
Ide61	T1_N	20	D4	C2	23	0.97281	Male
Ifa52	T3_N	20	D2	C2	NA	NA
Ide62	T1_N	21	D5	C1	4	0.169184	Male
Ifa68	T3_N	21	D5	C2	NA	NA
Ide64	T1_O	22	D1	C1	19	0.803625	Female
Ifa67	T3_O	22	D3	C1	NA	NA
Ide68	T1_O	23	D4	C1	19	0.803625	Female
Ifa51	T3_O	23	D5	C1	NA	NA
Ide59	T1_N	24	D3	C3	31	1.31118	Male
Ifa56	T3_N	24	D3	C3	NA	NA
Ide48	T1_N	26	D4	C1	19	0.803625	Male
Ifa49	T3_N	26	D3	C2	NA	NA
Ide60	T1_O	27	D3	C2	28	1.18429	Female
Ifa53	T3_O	27	D1	C2	NA	NA
Ide65	T1_N	29	D1	C1	42	1.77644	Female
Ifa57	T3_N	29	D5	C2	NA	NA
Ide9	T1_N	30	D3	C1	28	1.18429	Male
Ifa58	T3_N	30	D1	C1	NA	NA
Ide63	T1_O	31	D3	C2	40	1.69184	Female
Ifa55	T3_O	31	D5	C2	NA	NA
Ide70	T1_N	33	D3	C2	41	1.73414	Male
Ifa61	T3_N	33	D4	C2	NA	NA
Ide4	T1_N	34	D1	C3	37	1.56495	Male
Ifa13	T3_N	34	D1	C2	NA	NA
Ide50	T1_N	35	D4	C2	6	0.253776	Female
Ifa25	T3_N	35	D5	C2	NA	NA
Ide56	T1_N	36	D5	C3	35	1.48036	Male
Ifa30	T3_N	36	D2	C1	NA	NA
Ide55	T1_O	37	D4	C2	32	1.35347	Female
Ifa64	T3_O	37	D4	C1	NA	NA
Ide52	T1_O	39	D3	C1	6	0.253776	Female
Ifa17	T3_O	39	D1	C1	NA	NA
Ide49	T1_N	40	D4	C1	11	0.465257	Female
Ifa9	T3_N	40	D5	C2	NA	NA
Ide6	T1_N	41	D3	C2	27	1.14199	Female
Ifa10	T3_N	41	D4	C3	NA	NA
Ide53	T1_N	46	D4	C2	9	0.380665	Male
Ifa24	T3_N	46	D2	C1	NA	NA
Ide51	T1_N	48	D1	C2	37	1.56495	Female
Ifa28	T3_N	48	D1	C1	NA	NA
Ide2	T1_N	49	D4	C3	1	0.0422961	Male
Ifa33	T3_N	49	D4	C1	NA	NA
Ide66	T1_O	51	D3	C2	25	1.0574	Female
Ifa48	T3_O	51	D5	C1	NA	NA
Ide67	T1_N	52	D1	C1	19	0.803625	Male
Ifa23	T3_N	52	D5	C1	NA	NA
Ide5	T1_N	53	D3	C2	31	1.31118	Female
Ifa18	T3_N	53	D1	C2	NA	NA
Ide11	T1_N	54	D3	C2	31	1.31118	Female
Ifa20	T3_N	54	D1	C2	NA	NA
Ide57	T1_N	55	D3	C2	42	1.77644	Female
Ifa26	T3_N	55	D4	C2	NA	NA
Ide58	T1_N	57	D3	C1	8	0.338369	Male
Ifa29	T3_N	57	D1	C2	NA	NA
Ide12	T1_O	58	D1	C3	18	0.761329	Female
Ifa21	T3_O	58	D5	C1	NA	NA
Ide8	T1_N	59	D3	C1	13	0.549849	Male
Ifa22	T3_N	59	D3	C1	NA	NA
Ide69	T1_O	60	D3	C2	39	1.64955	Female
Ifa66	T3_O	60	D4	C1	NA	NA
Ide54	T1_O	61	D1	C2	25	1.0574	Male
Ifa19	T3_O	61	D2	C3	NA	NA
Ide25	T1_N	62	D3	C4	3	0.126888	Male
Ifa12	T3_N	62	D1	C4	NA	NA
Ide28	T1_N	63	D3	C4	31	1.31118	Female
Ifa16	T3_N	63	D3	C4	NA	NA
Ide32	T1_O	65	D4	C3	44	1.86103	Male
Ifa32	T3_O	65	D2	C3	NA	NA
Ide27	T1_N	66	D3	C1	16	0.676737	Male
Ifa31	T3_N	66	D4	C1	NA	NA
Ide26	T1_O	67	D4	C3	44	1.86103	Male
Ifa11	T3_O	67	D5	C3	NA	NA
Ide42	T1_O	69	D3	C3	44	1.86103	Male
Ifa27	T3_O	69	D5	C3	NA	NA
Ide20	T1_O	71	D3	C3	38	1.60725	Female
Ifa6	T3_O	71	D1	C1	NA	NA
Ide33	T1_N	72	D4	C3	33	1.39577	Female
Ifa3	T3_N	72	D4	C1	NA	NA
Ide21	T1_O	73	D3	C2	8	0.338369	Male
Ifa1	T3_O	73	D5	C3	NA	NA
Ide38	T1_O	74	D4	C3	36	1.52266	Female
Ifa2	T3_O	74	D4	C2	NA	NA
Ide40	T1_N	75	D4	C3	2	0.0845921	Male
Ifa4	T3_N	75	D4	C3	NA	NA
Ide39	T1_O	76	D2	C4	43	1.81873	Male
Ifa14	T3_O	76	D4	C3	NA	NA
Ide31	T1_N	77	D4	C4	1	0.0422961	Male
Ifa5	T3_N	77	D2	C1	NA	NA
Ide29	T1_O	78	D3	C2	10	0.422961	Male
Ifa43	T3_O	78	D2	C2	NA	NA
Ide30	T1_O	80	D5	C3	26	1.0997	Male
Ifa69	T3_O	80	D2	C4	NA	NA
Ide37	T1_O	81	D5	C4	1	0.0422961	Female
Ifa42	T3_O	81	D4	C3	NA	NA
Ide24	T1_O	82	D2	C3	2	0.0845921	Male
Ifa70	T3_O	82	D4	C4	NA	NA
Ide22	T1_O	83	D2	C3	19	0.803625	Male
Ifa35	T3_O	83	D2	C3	NA	NA
Ide41	T1_N	84	D4	C4	43	1.81873	Female
Ifa8	T3_N	84	D4	C4	NA	NA
Ide36	T1_O	85	D4	C1	14	0.592145	Male
Ifa37	T3_O	85	D5	C2	NA	NA
Ide35	T1_O	86	D4	C3	41	1.73414	Male
Ifa41	T3_O	86	D2	C3	NA	NA
Ide43	T1_O	87	D1	C3	34	1.43807	Female
Ifa38	T3_O	87	D3	C3	NA	NA
Ide45	T1_O	88	D2	C4	32	1.35347	Male
Ifa39	T3_O	88	D5	C3	NA	NA
Ide46	T1_O	91	D3	C4	20	0.845921	Male
Ifa7	T3_O	91	D5	C4	NA	NA
Ide23	T1_N	93	D4	C1	5	0.21148	Male
Ifa15	T3_N	93	D4	C3	NA	NA
Ide44	T1_O	95	D4	C3	39	1.64955	Female
Ifa36	T3_O	95	D5	C3	NA	NA
Ide47	T1_O	96	D4	C4	42	1.77644	Female
Ifa34	T3_O	96	D2	C4	NA	NA
Ide34	T1_O	97	D4	C3	29	1.22659	Female
Ifa40	T3_O	97	D2	C3	NA	NA
